# Supplementary figures and images for: Zanubrutinib plus R‐CHOP for the treatment of newly diagnosed double‐expressor lymphoma: A phase 2 clinical study
Source: PubMed Central journal article supplement — Cancer. 2025 Jan 3;131(1):e35697. doi: 10.1002/cncr.35697 (PMC11696200; doi:10.1002/cncr.35697), 2025-01-03

# Supplementary figure 1

## A

### PFS

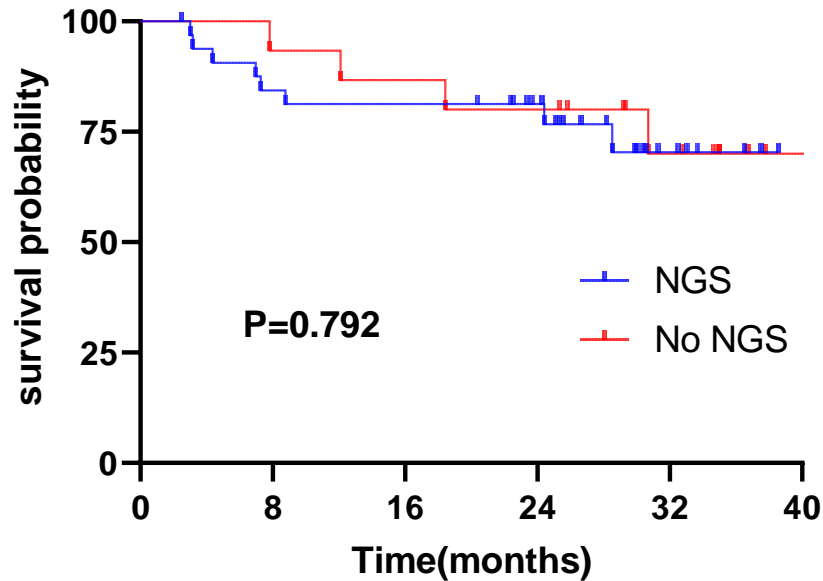

## B

### OS

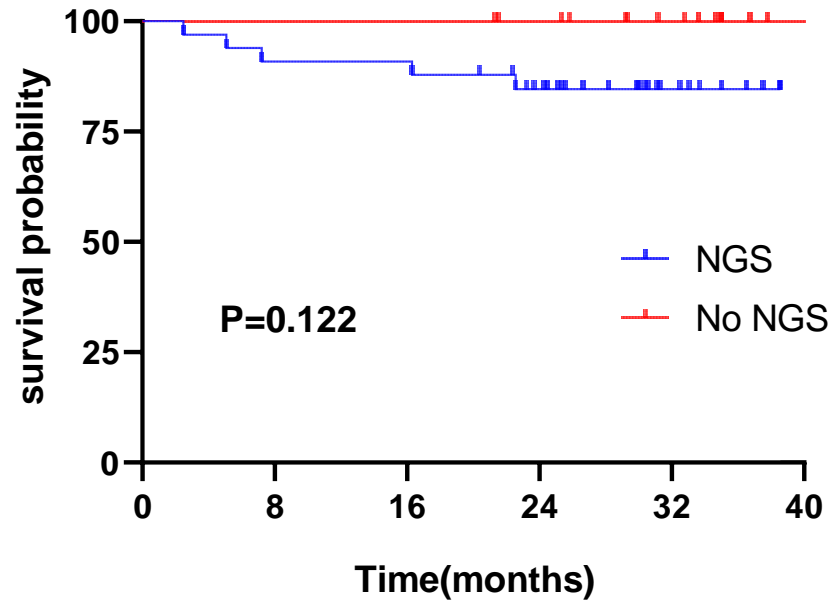

Supplement: CNCR-131-0-s003.pdf [file CNCR-131-0-s003.pdf]
